# Supplementary material
Source: publisher figshare collection journal article supplement (https://asha.figshare.com/articles/dataset/_/16799545)
Supplement: Supplementary file 2 [file 1]

**Supplemental Material S2. Strong words that convey precise emotions.**

|                 | <b>Happy/Glad</b>                                                                                                                                                                                       | <b>Sad</b>                                                                                                                                                                                | <b>Mad</b>                                                                                                            | <b>Scared</b>                                                                                                                       | <b>Other</b>                                                                                                                                                                             |
|-----------------|---------------------------------------------------------------------------------------------------------------------------------------------------------------------------------------------------------|-------------------------------------------------------------------------------------------------------------------------------------------------------------------------------------------|-----------------------------------------------------------------------------------------------------------------------|-------------------------------------------------------------------------------------------------------------------------------------|------------------------------------------------------------------------------------------------------------------------------------------------------------------------------------------|
| <b>MILD</b>     | Amused<br>Appreciated<br>Calm<br>Comfortable<br>Confident<br>Contented<br>Empathetic<br>Encouraged<br>Enthusiastic<br>Glad<br>Grateful<br>Open<br>Pleased<br>Relieved<br>Satisfied                      | Bored<br>Confused<br>Disappointed<br>Discontented<br>Puzzled<br>Uncertain                                                                                                                 | Bothered<br>Contrary<br>Disapproving<br>Irritated<br>Ticked                                                           | Bashful<br>Cautious<br>Concerned<br>Tense<br>Uneasy<br>Uptight                                                                      | Attentive<br>Caught<br>Curious<br>Determined<br>Envious<br>Indifferent<br>Interested<br>Stuck<br>Stunned<br>Sympathetic<br>Thoughtful<br>Undecided                                       |
| <b>MODERATE</b> | Accepting<br>Assertive<br>Centered<br>Certain<br>Close<br>Compassionate<br>Delighted<br>Eager<br>Happy<br>Hopeful<br>Loving<br>Meditative<br>Optimistic<br>Satisfied<br>Secure<br>Surprised<br>Trusting | Abandoned<br>Discouraged<br>Distressed<br>Down<br>Embarrassed<br>Foolish<br>Guilty<br>Empty<br>Hurt<br>Lonely<br>Sad<br>Regretful<br>Rejected                                             | Disgusted<br>Exasperated<br>Provoked<br>Resentful<br>Surly<br>Used                                                    | Afraid<br>Agitated<br>Anxious<br>Disbelieving<br>Fearful<br>Frightened<br>Nervous<br>Threatened<br>Withdrawn<br>Worried<br>Vigilant | Ashamed<br>Apologetic<br>Arrogant<br>Determined<br>Frustrated<br>Innocent<br>Jealous<br>Mischievous<br>Numb<br>Oppositional<br>Pressured<br>Smug<br>Stubborn<br>Suspicious<br>Vulnerable |
| <b>STRONG</b>   | Beloved<br>Blissful<br>Ecstatic<br>Elated<br>Enthusiastic<br>Enthralled<br>Enraptured<br>Excited<br>Free<br>Fulfilled<br>Passionate<br>Powerful<br>Safe<br>Thrilled                                     | Anguished<br>Betrayed<br>Crushed<br>Defeated<br>Depressed<br>Despairing<br>Devastated<br>Grieving<br>Helpless<br>Hopeless<br>Humiliated<br>Miserable<br>Pained<br>Overwhelmed<br>Tortured | Angry<br>Aggressive<br>Boiling<br>Burned<br>Enraged<br>Furious<br>Hateful<br>Hot<br>Infuriated<br>Outraged<br>Steamed | Desperate<br>Panicked<br>Petrified<br>Scared<br>Shocked<br>Terrified<br>Terrorized                                                  | Conflicted<br>Exhausted<br>Idiotic<br>Obstinate<br>Paranoid<br>Shame<br>Torn                                                                                                             |
