# Supplementary material
Source: publisher figshare collection journal article supplement (https://asha.figshare.com/articles/dataset/_/16799545)
Supplement: Supplementary file 6 [file 1]

### **Supplemental Material S3. Using conjunctions to form complex sentences.**

Conjunctions are words that connect words, phrases, and sentences.  
Subordinating conjunctions are the most advanced.

#### **Coordinating Conjunctions**

These are words that connect two ideas of equal importance in one sentence.

##### *Early Developing Conjunctions* (acquired by 5 years)

|     |     |     |     |
|-----|-----|-----|-----|
| for | and | nor | but |
| or  | yet | so  |     |

##### *Later Developing Conjunctions* (use in middle of sentence)

|             |              |           |           |
|-------------|--------------|-----------|-----------|
| accordingly | also         | anyway    | besides   |
| certainly   | consequently | finally   | however   |
| indeed      | instead      | likewise  | meanwhile |
| next        | now          | otherwise | similarly |
| still       | then         | therefore | thus      |

##### Conjunction Pairs (use in same sentence)

|                |                   |                   |            |
|----------------|-------------------|-------------------|------------|
| both/and       | if/then           | neither/nor       | not/but    |
| either/or      | not only/but also | as/as             | whether/or |
| no sooner/than | so/as             | the more/the less | just as/so |

#### **Subordinating Conjunctions**

These are words that connect two or more ideas in one sentence. One idea is independent and the other ideas are dependent.

##### *Early Developing* (5–7 years)

|       |         |        |       |
|-------|---------|--------|-------|
| after | because | before | since |
| than  | that    | until  | when  |
| where | while   | who    | why   |

##### *Later Developing*

|            |                  |                   |              |
|------------|------------------|-------------------|--------------|
| although   | as/as if         | as soon (well) as | by the time  |
| every time | even if (though) | if/if only        | just in case |
| now that   | once             | rather            | rather than  |
| though     | than             | unless            | whenever     |
| whereas    | wherever         | which             | whoever      |
| whom       | whomever         | whose             | whichever    |
